# Supplementary material for: An Alternatively Spliced Variant of METTL3 Mediates Tumor Suppression in Hepatocellular Carcinoma
Source: MDPI journal article supplement (doi:10.3390/genes13040669), 2022-04-11
Supplement: s1 [file s1]

**Table S2 List of primers used in this study.**

| Primers for qRT-PCR |             |                            |
|---------------------|-------------|----------------------------|
| Gene                | Human/mouse | Sequence (5'-3')           |
| METTL3-A            | Human       | F: CTAAACCTAAGAATTTATAGAAG |
|                     |             | R: CCAACTACAATACAAATGTTTAT |
| METTL3-B            | Human       | F: CACTGCTTGGTTCGTTCCACCAG |
|                     |             | R: GAATCCCAACTACAATACAAATG |
| METTL3-C            | Human       | F: TGATTGAGCATCGGAACCAGCAA |
|                     |             | R: GCTCTAGGATCTCCTGACTGACC |
| METTL3-D            | Human       | F: CAACAGAGCAAGAAGGTCGGGCC |
|                     |             | R: CCATGGCCCTGCCTGTGACCCAG |
| MLF2                | Human       | F: GGAATCGGCTCTGGAAGGTG    |
|                     |             | R: GCTCAGCTCTGGGATGATGT    |
| NKD2                | Human       | F: ACAGGAGGTTGTCTGCACACG   |
|                     |             | R: GACTTGAGGAACTGCTTCTCC   |
| SOCS2               | Human       | F: TGCAAGGATAAGCGGACAGG    |
|                     |             | R: CAGAGATGGTGCTGACGTGT    |
| JUNB                | Human       | F: AGGCTCGGTTTCAGGAGTTT    |
|                     |             | R: GAACAGCCCTTCTACCACGA    |
| BMI1                | Human       | F: CATCCACAGTTTCCTCACATTTC |
|                     |             | R: GAAGTTGCTGATGACCCATTTAC |
| EGFR                | Human       | F: TCTGAGTGCAACCAGCAACA    |
|                     |             | R: GTGGGGTCTGAGCTGTATCG    |
| BATF2               | Human       | F: GCAGGGGTCTTCCTCTAAGC    |
|                     |             | R: GCTGCTGAGAGAGCAGGTTT    |
| GAPDH               | Human       | F: TCAAGTGGGGCGATGCTGGC    |
|                     |             | R: TGGGGGCATCAGCAGAGGGG    |
| Mettl3-a            | Mouse       | F: ACCGGAAGTGGCTTTTCATCTTG |
|                     |             | R: CCTTAAATCCAAGTGCCCAGAGT |
| Mettl3-b            | Mouse       | F: TCCACCTCAGGGCCATGGAATTG |
|                     |             | R: GTGGAACGAACCAAGCAGTGTTT |
| Gapdh               | Mouse       | F: TTCACCACCATGGAGAAGGC    |
|                     |             | R: GGCATGGACTGTGGTCATGA    |
| Primers for PCR     |             |                            |
| METTL3-A            | Human       | F: GGAGAGAATGTCTAAACCTCTGG |
|                     |             | R: CCAACTACAATACAAATGTTTAT |
| METTL3-C            | Human       | F: AGTTGATTGAGCATCGGAACCAG |
|                     |             | R: GTTACACAAGATTGCAATTCTAG |
| METTL3-D            | Human       | F: GAACAACAGAGCAAGAAGGTCGG |
|                     |             | R: ATTGTACAAATATCACTCTTCAG |
